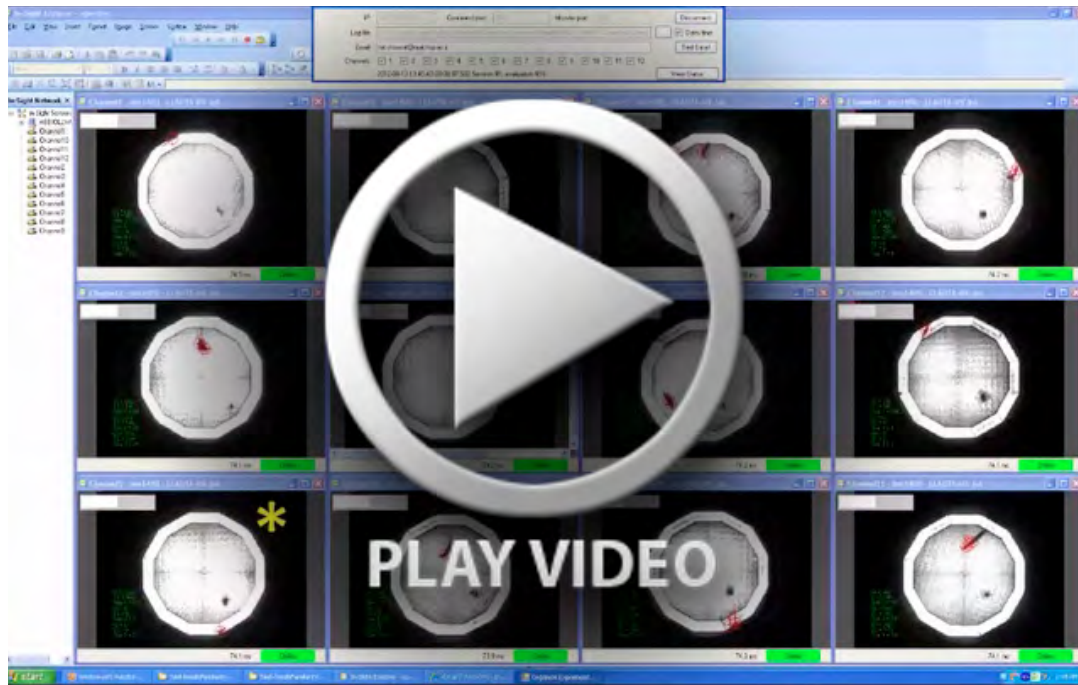

**Movie 1.** Exploration/foraging behavior during the test. At the start, all of the 12 ATA's chambers can be seen. It's seen that the worm in chamber 5 is leaving the illuminated quadrant (with the liver) before making a second approach after short exploration in two other quadrants. It's also clear that the worms prefer the edge especially when they enter into the illuminated area. Then chamber 5 is focused upon (previously labeled with a yellow asterisk). After entering the illuminated quadrant, the worm recognizes the liver, directing its motion to it, approaches, and then initiates a feeding. The movie was captured from the computer screen displaying the ATA's camera interface. The movie is in real time, displaying the real movement rate of the worms. The illumination of the quadrant with the liver cannot be seen due to a blue filter on the ATA's cameras.
